# Supplementary material for: Anti-Inflammatory Activity of Bryophytes Extracts in LPS-Stimulated RAW264.7 Murine Macrophages
Source: MDPI journal article supplement (doi:10.3390/molecules27061940), 2022-03-17
Supplement: s1 [file s1]

## Supplementary Material

**A**

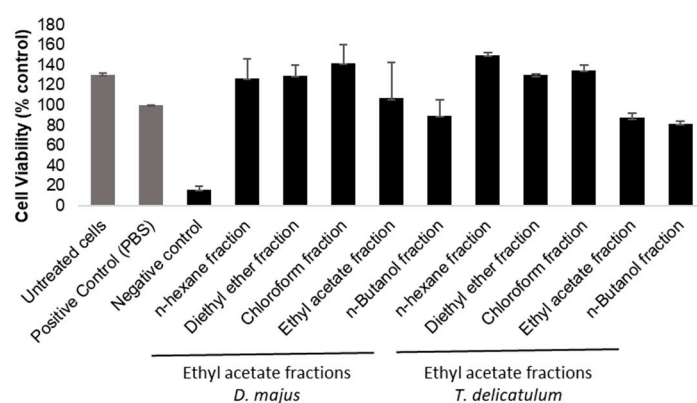

**B**

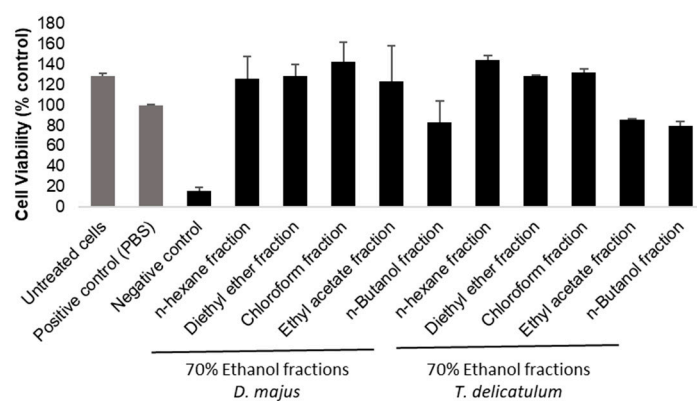

**Figure S1.** Effect of 70% ethanol and ethyl acetate derived fractions on the viability of RAW 264.7 cells determined by MTT assay. **A)** Ethyl acetate derived fractions from *D. majus* and *T. delicatulum* and **B)** 70% ethanol derived fractions from *D. majus* and *T. delicatulum*. Cells were treated with 10  $\mu\text{g/mL}$  of fractions for 24 h. Data represent mean  $\pm$  standard deviation ( $n= 2-3$ ) and values are normalized on control (PBS). Negative control (10% DMSO).

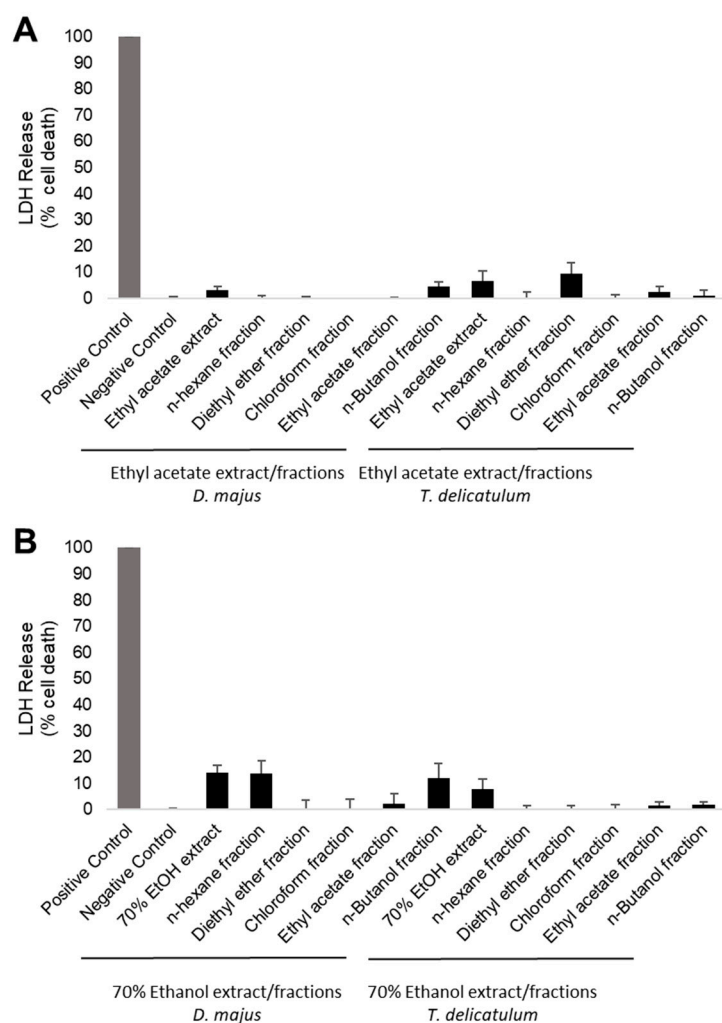

**Figure S2.** Cell death assessed by lactate dehydrogenase (LDH) release assay after treatment with bioactive whole extracts and derived fractions. **A)** Ethyl acetate extracts and derived fractions of *D. majus* and *T. delicatulum*. **B)** 70% ethanol extracts and derived fractions of *D. majus* and *T. delicatulum*. Cells were treated with 10  $\mu\text{g/mL}$  of extracts/fractions for 24 h. Data represent mean  $\pm$  standard deviation ( $n= 2-3$ ). Positive control (no treated lyzed cells) and negative control (0.1 % DMSO). The tested extracts/fractions revealed significant difference ( $P$ -values  $< 0.05$ , calculated with ANOVA).

**Table S1.** List of species screened for anti-inflammatory activity and information on collection area.

| Group of bryophytes | Family           | Species                                                         | Country-<br>collection<br>place | GPS coordinates |              | Date of collection |         |
|---------------------|------------------|-----------------------------------------------------------------|---------------------------------|-----------------|--------------|--------------------|---------|
|                     |                  |                                                                 |                                 | Latitude        | Longitude    |                    |         |
| Mosses              |                  |                                                                 |                                 |                 |              |                    |         |
|                     | Amblystegiaceae  | <i>Warnstorfia fluitans</i> (Hedw.) Loeske                      | Iceland                         | 64.14197491     | -20.23437432 | 12 June 2019       |         |
|                     | Bartramiaceae    | <i>Philonotis fontana</i> (Hedw.) Brid.                         | Iceland                         | 64.14389823     | -20.22702004 | 12 June 2019       |         |
|                     | Brachytheciaceae | <i>Brachythecium rutabulum</i> (Hedw.) Schimp.                  | Germany, Black Forest           | 47.917959       | 8.075349     | 28 April 2018      |         |
|                     |                  | <i>Cirriphyllum crassinervium</i> (Taylor) Loeske & M. Fleisch. | Denmark, Rude Skov              | 55.84145        | 12.47838     | 24-25 2018         | October |

|             |                                                                               |                                                         |            |            |                                  |
|-------------|-------------------------------------------------------------------------------|---------------------------------------------------------|------------|------------|----------------------------------|
|             | <i>Homalothecium<br/>lutescens</i> (Hedw.)<br>H. Rob.                         | Sweden                                                  | 55.7168043 | 13.7214639 | 10 September<br>2019             |
|             | <i>Homalothecium<br/>sericeum</i> (Hedw.)<br>Schimp.                          | Germany,<br>Black<br>Forest                             | 47.917733  | 8.075181   | 28 April 2018                    |
|             | <i>Kindbergia<br/>praelonga</i> (Hedw.)<br>Ochyra                             | Moss<br>provider<br><br>(Bryoflor,<br>Paris,<br>France) | -          | -          | Purchased on<br>20 February 2019 |
| Bryaceae    | <i>Bryum<br/>pseudotriquetrum</i><br>(Hedw.) P. Gaertn.,<br>B. Mey. & Scherb. | Germany,<br>Black<br>Forest                             | 47.912221  | 8.081158   | 28 April 2018                    |
| Dicranaceae | <i>Dicranum majus</i><br>Turner                                               | Sweden                                                  | 56.02397   | 13.13074   | 27 October 2018                  |

|                      |  |                                                |                                         |            |             |                               |
|----------------------|--|------------------------------------------------|-----------------------------------------|------------|-------------|-------------------------------|
|                      |  | <i>Dicranum scoparium</i> Hedw.                | Denmark, Rude Skov                      | 55.84072   | 12.47253    | 24-25 October 2018            |
| <i>Grimmiaceae</i>   |  | <i>Racomitrium aciculare</i> (Hedw.) Brid.     | Germany, Black Forest                   | 47.910660  | 8.093621    | 28 April 2018                 |
|                      |  | <i>Racomitrium elongatum</i> Ehrh. ex Frisvoll | Sweden                                  | 55.7264294 | 13.70606602 | 10 September 2019             |
| <i>Hedwigiaceae</i>  |  | <i>Hedwigia ciliata</i> (Hedw.) P. Beauv.      | Moss provider (Bryoflor, Paris, France) | -          |             | Purchased on 20 February 2019 |
| <i>Hylocomiaceae</i> |  | <i>Hylocomium splendens</i> (Hedw.) Schimp.    | Sweden                                  | 55.7223757 | 13.7066895  | 10 September 2019             |

|           |                                                          |                             |             |              |               |           |
|-----------|----------------------------------------------------------|-----------------------------|-------------|--------------|---------------|-----------|
|           | <i>Rhytidiadelphus<br/>loreus</i> (Hedw.)<br>Warnst.     | Germany,<br>Black<br>Forest | 47.911177   | 8.092482     | 28 April 2018 |           |
|           | <i>Rhytidiadelphus<br/>squarrosus</i> (Hedw.)<br>Warnst. | Denmark,<br>Rude<br>Skov    | 55.84071    | 12.47371     | 24-25<br>2018 | October   |
|           | <i>Rhytidiadelphus<br/>triquetrus</i> (Hedw.)<br>Warnst. | Iceland                     | 64.32743787 | -20.28594921 | 13 June 2019  |           |
|           | <i>Rhytidiadelphus<br/>triquetrus</i> (Hedw.)<br>Warnst. | Sweden                      | 55.721833   | 13.7021155   | 10<br>2019    | September |
| Hypnaceae | <i>Hypnum<br/>cupressiforme</i><br>Hedw.                 | Denmark,<br>Rude<br>Skov    | 55.84201    | 12.4748      | 24-25<br>2018 | October   |

|                  |                                                           |                                         |             |            |                               |           |
|------------------|-----------------------------------------------------------|-----------------------------------------|-------------|------------|-------------------------------|-----------|
| Leucobryaceae    | <i>Campylopus introflexus</i> (Hedw.) Brid.               | Moss provider (Bryoflor, Paris, France) | -           | -          | Purchased on 20 February 2019 |           |
| Mniaceae         | <i>Mnium hornum</i> Hedw.                                 | Denmark, Rude Skov                      | 55.84161    | 12.47275   | 24-25 2018                    | October   |
|                  | <i>Plagiomnium undulatum</i> (Hedw.) T.J. Kop.            | Sweden                                  | 55.72548924 | 13.7051406 | 10 2019                       | September |
| Neckeraceae      | <i>Thamnobryum alopecurum</i> (Hedw.) Nieuwl. ex Gangulee | Germany, Black Forest                   | 47.917927   | 8.074989   | 28 April 2018                 |           |
| Plagiotheciaceae | <i>Plagiothecium undulatum</i> (Hedw.) Schimp.            | Denmark, Rude Skov                      | 55.84915    | 12.4582    | 24-25 2018                    | October   |

|                |                                                         |                             |             |              |               |         |
|----------------|---------------------------------------------------------|-----------------------------|-------------|--------------|---------------|---------|
| Polytrichaceae | <i>Polytrichum<br/>formosum</i> Hedw.                   | Germany,<br>Black<br>Forest | 47.911223   | 8.092431     | 28 April 2018 |         |
| Pylaisiaceae   | <i>Calliergonella<br/>cuspidata</i> (Hedw.)<br>Loeske   | Denmark,<br>Rude<br>Skov    | 55.84113    | 12.48188     | 24-25<br>2018 | October |
|                | <i>Ptilium<br/>crista-castrensis</i><br>(Hedw.) De Not. | Germany,<br>Black<br>Forest | 47.911766   | 8.089162     | 28 April 2018 |         |
| Sphagnaceae    | <i>Sphagnum<br/>fimbriatum</i> Wilson                   | Denmark,<br>Rude<br>Skov    | 55.84098    | 12.47348     | 24-25<br>2018 | October |
|                | <i>Sphagnum teres</i><br>(Schimp.)<br>Ångström          | Iceland                     | 64.32743787 | -20.28594921 | 13 June 2019  |         |



|                   |                 |                                                     |                             |           |          |                            |
|-------------------|-----------------|-----------------------------------------------------|-----------------------------|-----------|----------|----------------------------|
|                   | Thuidiaceae     | <i>Thuidium<br/>delicatulum</i><br>(Hedw.) Schimp.  | Sweden                      | 56.02422  | 13.12932 | 27 October 2018            |
| <b>Liverworts</b> |                 |                                                     |                             |           |          |                            |
|                   | Plagiochilaceae | <i>Plagiochila<br/>asplenioides</i> (L.)<br>Dumort. | Germany,<br>Black<br>Forest | 47.917927 | 8.074989 | 28 April 2018              |
|                   | Lepidoziaceae   | <i>Bazzania trilobata</i><br>(L.) Gray              | Germany,<br>Black<br>Forest | 47.911223 | 8.092431 | 28 April 2018              |
|                   | Metzgeriaceae   | <i>Metzgeria furcata</i><br>(L.) Corda              | Denmark,<br>Rude<br>Skov    | 55.84182  | 12.47596 | 24-25<br>2018      October |
